# Supplementary material for: Development and validation of treatment adherence scale in older people with Type 2 diabetes: a sequential exploratory mixed method
Source: Research Square preprint supplement (doi:10.21203/rs.3.rs-7902457/v1), 2025-12-02
Supplement: Supplementary file 1 [file 0e7df816d04fd7bd11194cc3.docx]

# Supplementary File 1. English Version of the Treatment Adherence Scale (TAS)

Title: Treatment Adherence Scale for Older Adults with Type 2 Diabetes (TAS)
Purpose: The scale is designed to assess the level of adherence to treatment among older adults with Type 2 diabetes.
Response format: 5-point Likert scale (1 = Never, 2 = Rarely, 3 = Sometimes, 4 = Often, 5 = Always)

## Section 1 – Adherence to Medication and Treatment (19 items)

1. I take my diabetes medication exactly as prescribed by my doctor.

2. I never skip my medication doses, even when I feel well.

3. I attend my scheduled medical appointments regularly.

4. I monitor my blood glucose as recommended.

5. I follow the instructions given by my healthcare team carefully.

6. I inform my healthcare provider before making any changes to my medication.

7. I keep a record of my blood sugar readings.

8. I complete my prescribed medical tests on time.

9. I ask questions when I do not understand the treatment instructions.

10. I use reminders (alarms, notes, or family support) to help me take my medications.

11. I refill my medications before they run out.

12. I continue my treatment even when symptoms improve.

13. I take my medicines even when I am busy or away from home.

14. I strictly follow the timing of my medication doses.

15. I check the expiry date and correct use of my medicines.

16. I organize my medicines to avoid confusion or missed doses.

17. I follow the treatment plan even if I experience mild side effects.

18. I maintain regular communication with my healthcare providers about my condition.

19. I follow advice related to insulin use or oral medication accurately.

## Section 2 – Adherence to Care and Nutrition (8 items)

20. I follow my recommended dietary plan for diabetes.

21. I limit my intake of sweets and high-carbohydrate foods.

22. I include vegetables and fiber-rich foods in my daily meals.

23. I control portion sizes during each meal.

24. I avoid skipping meals.

25. I monitor my weight regularly.

26. I perform regular foot care as advised.

27. I follow recommendations to prevent diabetes complications.

## Section 3 – Adherence to Activity Plan (5 items)

28. I engage in physical activity or exercise suitable for my health condition.

29. I try to stay active even when I feel tired or unmotivated.

30. I perform exercises as advised by my healthcare provider.

31. I maintain consistency in my physical activity routine.

32. I adjust my activity level according to my health status and doctor’s advice.

## Section 4 – Supportive Engagement (Helpfulness) (5 items)

33. My family members remind me to take my medications or follow my treatment plan.

34. I receive emotional support from my family or friends regarding my illness.

35. I seek help from others when I face difficulties managing my diabetes.

36. I share my health concerns with people I trust.

37. My family helps me attend medical visits or perform self-care activities.

## Scoring

For each item, responses range from 1 (Never) to 5 (Always). Higher scores indicate better treatment adherence. The total score ranges from 37 to 185. Scores can also be analyzed by subscale (four domains).
